# Supplementary material
Source: PubMed Central journal article supplement (PMC3475333)
Supplement: mmc1.pdf [file mmc1.pdf]

**Amplification and temporal filtering  
during gradient sensing by nerve growth cones  
probed with a microfluidic assay**

Mathieu Morel,<sup>†</sup> Vasyl Shynkar,<sup>† ‡</sup> Jean-Christophe Galas,<sup>†</sup> Isabelle Dupin,<sup>† §</sup> Cedric Bouzigues,<sup>¶</sup> Vincent Studer,<sup>§ ||</sup> and Maxime Dahan<sup>†\*</sup>

<sup>†</sup> Laboratoire Kastler Brossel, CNRS UMR 8552, Département de Physique and Institut de Biologie de l'Ecole normale supérieure, Université Pierre et Marie Curie, Paris, France.

<sup>‡</sup> Fondation Pierre-Gilles de Gennes.

<sup>§</sup> Univ. Bordeaux, Interdisciplinary Institute for Neuroscience, UMR 5297, F-33000 Bordeaux, France.

<sup>¶</sup> Laboratoire Optique et Biosciences, CNRS, INSERM and Ecole Polytechnique, Palaiseau, France.

<sup>||</sup> CNRS, Interdisciplinary Institute for Neuroscience, UMR 5297, F-33000 Bordeaux, France.

**SUPPLEMENTARY MATERIALS**

- 1. Effect of the shear stress on the morphology of a neuronal growth cone.**
- 2. Modeling of diffusive properties in the microdevice.**
- 3. Generation of an exponential concentration profile.**
- 4. Determination of the parameters  $h$  and  $K$ .**

## 1. Effect of the shear stress on the morphology of a neuronal growth cone

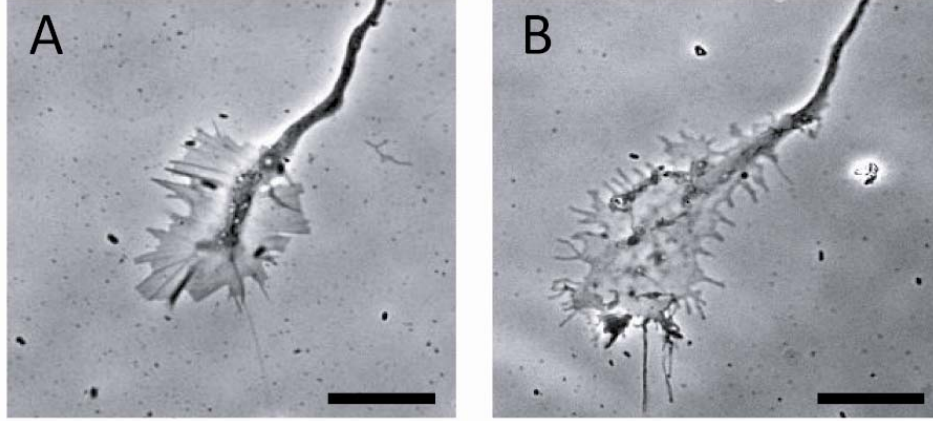

**Fig. S1:** DRG growth cone in a flowing microchannel (vertical, up-down flow). A) At a mean flow speed of  $5 \mu\text{m}\cdot\text{s}^{-1}$  (approx. shear stress of  $5\cdot 10^{-4} \text{N}\cdot\text{m}^{-2}$ ). B) Less than 2 minutes after an increase of the flow speed to  $500 \mu\text{m}\cdot\text{s}^{-1}$  (approx. shear stress of  $5\cdot 10^{-2} \text{N}\cdot\text{m}^{-2}$ ). Scale bars  $20 \mu\text{m}$ .

## 2. Modeling of the diffusive properties in the microdevice

To test the performance of our devices, we have implemented a simple two-dimensional description of the diffusion in the microchamber (**Fig. S2 A**). We considered the diffusion equation in the  $y, z$  coordinates – the  $x$  axis is the flow direction in the microchannel – for a solute of diffusion coefficient  $D$  and concentration  $c(y, z, t)$ .

$$\frac{\partial c}{\partial t} = D \cdot \left( \frac{\partial^2 c}{\partial y^2} + \frac{\partial^2 c}{\partial z^2} \right)$$

We modeled the membrane as a semi-absorbent boundary with permeability  $\kappa$  and the walls and the glass coverslip as reflective boundaries:

$$D \cdot \frac{\partial c}{\partial z} \Big|_{z=0^+} = \kappa \cdot (c(y, z=0^-, t) - c(y, z=0^+, t))$$

$$\frac{\partial c}{\partial y} \Big|_{\pm w/2} = 0 \quad \text{and} \quad \frac{\partial c}{\partial z} \Big|_L = 0$$

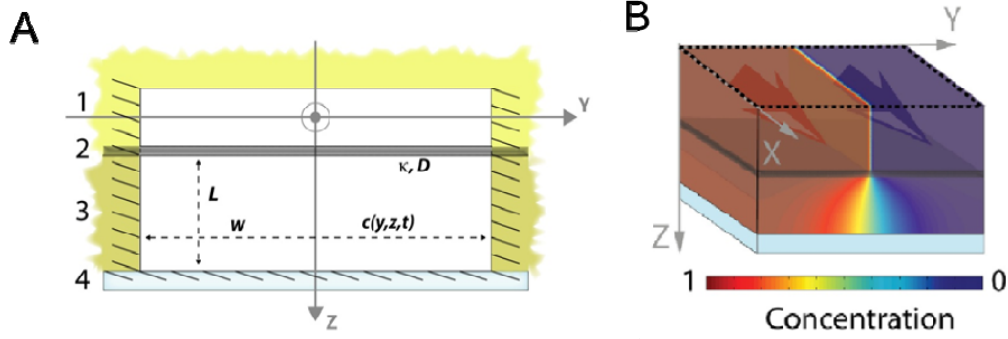

**Fig. S2:** A) Scheme used for modeling diffusive processes in the microdevice. The microfluidic channel (1) imposes the concentration condition  $c(y,z=0,t)$  at the membrane. The membrane (2) transfers the concentration to the micro-well (3) assuming a semi-permeable boundary with permeability coefficient  $\kappa$ . The solute diffuses freely in the micro-chamber from the membrane (2) to the coverslip (4). B) The gradient generated by diffusion in the micro-well can be simulated using finite-elements modeling.

In our experiments, the membrane was thin compared to the chamber height (ratio~10) and had pores with characteristic size 400 nm, much larger than the size of GABA ligands (MW 103,  $D_{\text{GABA}} = 700 \mu\text{m}^2/\text{s}$ ) or fluorescein markers (MW 389,  $D_{\text{Fluorescein}} = 450 \mu\text{m}^2/\text{s}$ ). Therefore, we assumed the limit of infinite permeability  $\kappa$ , where the concentration profile in the microchannel  $c(y,z=0,t)$  was completely transferred to the other side of the membrane within the microchamber.

### 3. Generation of an exponential concentration profile.

For our gradient sensing assays, we used a Y-shaped geometry with a co-flow in the microchannel (**Fig. S2 B**). One inlet was filled with a solution of GABA ( $C_0 = 200 \mu\text{M}$ ) and fluorescein ( $0.5 \mu\text{M}$ ) in air-buffered medium, and the other with medium only. In order to obtain a gradient with fixed relative steepness  $\delta = \nabla c/c$  over a large region, we carefully adjusted the relative pressure between the two streams with pressure regulators (OEM-EP 0-2 psi, Parker) and placed the interface at 1/5 of the channel width ( $y_0 = 200 \mu\text{m}$ ). For the ligand, this corresponds to a profile  $c(y,z=0^+) = C_0(1 - H(y - y_0))$  where  $H(y)$  is the Heaviside function (equal to 0 for  $y < 0$  and 1 for  $y > 1$ ) and  $y_0$  is the position of the interface between the two streams. The diffusion equation was numerically solved using a partial differential equation solver (Matlab, MathWorks), for an initially empty chamber  $c(y, 0 < z < L, t = 0) = 0$ ,

and with boundary condition  $c(y, z = 0^+) = C_0(1 - H(y - y_0))$ . After diffusion of the ligand through the chamber height ( $L = 200 \mu\text{m}$ ), the computation of the profile at the coverslip surface  $c(y, L, t)$  resulted into an exponential profile (with constant relative steepness  $\delta$ ) in the central part of the coverslip ( $250 < y < 800 \mu\text{m}$ ) (**Fig. S3 A**). For each measured GC, we determined the absolute concentration and steepness (**Fig. S3 B**).

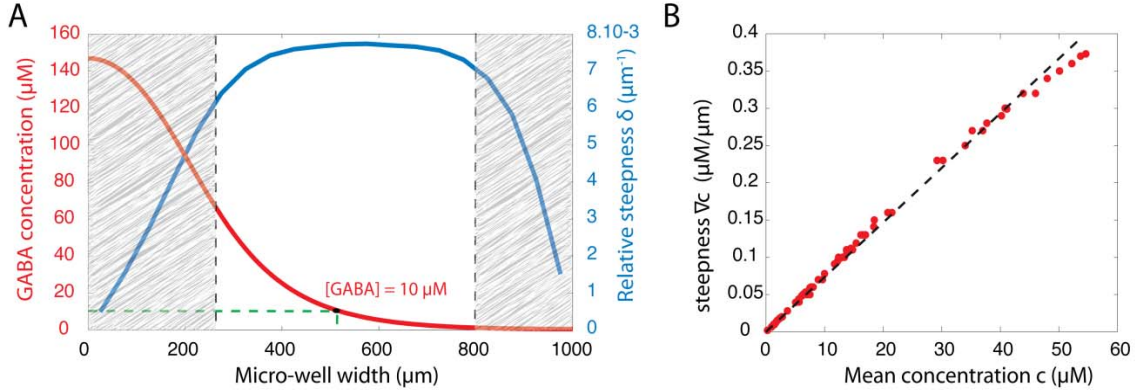

**Fig. S3:** Generation of an exponential gradient in the micro-well. A) Simulation of the concentration profile at the bottom of a  $200 \mu\text{m}$  high micro-well. A  $200 \mu\text{m}$  wide coflow of  $200 \mu\text{M}$  GABA is generated in the microchannel. B) Values of the gradient parameters (mean concentration and steepness) for the measured growth cone (red dots). The slope corresponds to  $\delta = 7.5 \pm 0.4 \cdot 10^{-3} \mu\text{m}^{-1}$ .

#### 4. Determination of the parameters $h$ and $K$

In our experimental conditions, the gradient was sufficiently shallow and the amplitude  $A(c)$  could be approximated by a function proportional to  $f'(c)$  (Fig. 6 D). With a least square optimization procedure, we found that the best fit was obtained for  $h_m = 2.1$  and  $K_m = 18 \mu\text{M}$ .

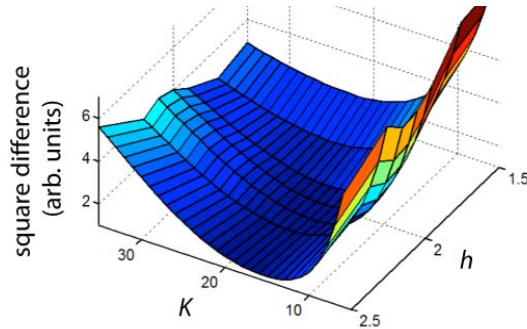

**Fig. S4:** Square difference between the data  $A(c)$  in the experiments and a curve proportional to  $f'(c)$ . The minimum value is for  $h_m = 2.1$  and  $K_m = 18 \mu\text{M}$
